## Secretagogues stimulate electrogenic $\text{HCO}_3^-$ secretion in the ileum of the brushtail possum, *Trichosurus vulpecula*: evidence for the role of a $\text{Na}^+/\text{HCO}_3^-$ cotransporter

Ray C. Bartolo<sup>1,2</sup>, Natalie Harfoot<sup>1</sup>, Mike Gill<sup>1</sup>, Bernie J. McLeod<sup>2</sup> and A. Grant Butt<sup>1,\*</sup>

<sup>1</sup>Department of Physiology, School of Medical Sciences, University of Otago, PO Box 913, Dunedin 9054, New Zealand and

<sup>2</sup>AgResearch, Invermay Agricultural Centre, Private Bag 50034, Mosgiel 9024, New Zealand

\*Author for correspondence (e-mail: grant.butt@otago.ac.nz)

Accepted 13 May 2009

### SUMMARY

Fluid secretion is essential for intestinal function and, in eutherian mammals, is driven by electrogenic  $\text{Cl}^-$  transport, which is dependent upon a bumetanide-sensitive, basolateral  $\text{Na}^+/\text{K}^+/\text{2Cl}^-$  cotransporter, NKCC1. However, ileal secretion in the brushtail possum, a marsupial, involves a fundamentally different process, since NKCC1 expression is low in this tissue and the secretagogue-induced short circuit current ( $I_{sc}$ ) is insensitive to bumetanide. In view of these differences we have investigated the basis of the secretory response of the possum ileum. In the Ussing chamber the secretory  $I_{sc}$  is independent of  $\text{Cl}^-$  but dependent upon  $\text{Na}^+$  and serosal  $\text{HCO}_3^-/\text{CO}_2$ , suggesting that secretagogues stimulate electrogenic  $\text{HCO}_3^-$  secretion. In agreement with this, serosal DIDS (4,4'-diisothiocyano-stilbene-2,2'-disulfonate;  $1 \text{ mmol l}^{-1}$ ) inhibited the secretory response. However, acetazolamide ( $1 \text{ mmol l}^{-1}$ ) and serosal amiloride ( $1 \text{ mmol l}^{-1}$ ) had little effect, indicating that  $\text{HCO}_3^-$  secretion is driven by  $\text{HCO}_3^-$  transport from the serosal solution into the cell, rather than hydration of  $\text{CO}_2$  by carbonic anhydrase. Consistent with this the pancreatic variant of the electrogenic  $\text{Na}^+/\text{HCO}_3^-$  cotransporter (pNBC) is highly expressed in the ileal epithelium and is located in the basolateral membrane of the epithelial cells, predominantly in the mid region of the villi, with lower levels of expression in the crypts and no expression in the villous tips. We conclude that the secretory response of the possum ileum involves electrogenic  $\text{HCO}_3^-$  secretion driven by a basolateral pNBC and that the ileal  $\text{HCO}_3^-$  secretion is associated with a specialised function of the possum ileum, most probably related to hindgut fermentation.

Key words: brushtail possum, *Trichosurus vulpecula*, marsupial, ileum, bicarbonate secretion,  $\text{NaHCO}_3$  cotransport.

### INTRODUCTION

Fluid secretion in the small intestine maintains the composition of the luminal contents in order to optimise digestion and the absorption of nutrients, and is driven by the net movement of salt into the lumen, thus creating an osmotic gradient for the flow of water (Halm and Frizzell, 1990). In the duodenum and ileum of eutherian mammals, this transport mechanism is primarily driven by epithelial  $\text{Cl}^-$  secretion, but  $\text{HCO}_3^-$  transport also occurs and functions to maintain pH and the composition of the luminal fluid (Minhas et al., 1993; Seidler et al., 1997; Spiegel et al., 2003). The  $\text{HCO}_3^-$  secretion consists of two components. The first results from the absorption of  $\text{Cl}^-$ , and involves the exchange of luminal  $\text{Cl}^-$  for intracellular  $\text{HCO}_3^-$  across the apical membrane (Spiegel et al., 2003). This anion exchange is thought to be mediated by the SLC26 family of transporters, although their role in intestinal secretion is somewhat controversial (for a review, see Dorwart et al., 2007). The second component of intestinal  $\text{HCO}_3^-$  secretion in eutherian mammals is associated with electrogenic  $\text{Cl}^-$  secretion, which drives intestinal fluid secretion in these mammals *via* the cystic fibrosis transmembrane conductance regulator (CFTR) channel (Poulsen et al., 1994). Secretagogues that stimulate  $\text{Cl}^-$  secretion *via* CFTR, also stimulate electrogenic  $\text{HCO}_3^-$  secretion, but the  $\text{HCO}_3^-$  component of secretion is generally significantly less than that for  $\text{Cl}^-$  (Minhas et al., 1993; Seidler et al., 1997; Spiegel et al., 2003). Although it has recently been shown that duodenal  $\text{HCO}_3^-$  secretion can also occur independently of CFTR (Sellers et al., 2008), it is notable that in humans suffering from cystic fibrosis and in CFTR knockout mice, both  $\text{Cl}^-$  and  $\text{HCO}_3^-$

secretion are severely compromised (Oloughlin et al., 1991; Grubb, 1997).

The first step in electrogenic  $\text{Cl}^-$  secretion is the entry of  $\text{Cl}^-$  into the cell across the basolateral membrane of the epithelial cells, through the activity of the  $\text{Na}^+/\text{K}^+/\text{2Cl}^-$  cotransporter (NKCC1) (Halm and Frizzell, 1990). The activity of this transporter accumulates  $\text{Cl}^-$  in the cell above its electrochemical equilibrium and, as a result, activation of the apical  $\text{Cl}^-$  channel, CFTR, results in the secretion of  $\text{Cl}^-$  across the apical membrane (Welsh et al., 1983).

The ileum of the Australian common brushtail possum, *Trichosurus vulpecula*, which is a metatherian mammal, expresses low levels of the NKCC1 and neither cAMP- nor  $\text{Ca}^{2+}$ -dependent secretagogues stimulate electrogenic  $\text{Cl}^-$  secretion (Bartolo et al., 2009). This differs markedly from the situation in the ileum of eutherian mammals, where a high level of NKCC1 expression in the crypt cells is associated with the secretion of  $\text{Cl}^-$ , which drives intestinal fluid secretion (Field, 2003). Despite the low levels of expression of NKCC1 in the possum, secretagogues do stimulate a secretory response. This response is independent of  $\text{Cl}^-$  and is not inhibited by bumetanide (Bartolo et al., 2009), a known inhibitor of NKCC1 (Gamba, 2005). However, it is dependent upon  $\text{HCO}_3^-$ , which suggests it may involve electrogenic  $\text{HCO}_3^-$  secretion (Bartolo et al., 2009).

The  $\text{HCO}_3^-$  that is secreted by epithelia can be derived either from the hydration of  $\text{CO}_2$  by carbonic anhydrase within the cell or the transport of  $\text{HCO}_3^-$  across the basolateral membrane. The electrogenic  $\text{Na}^+/\text{HCO}_3^-$  cotransporter, NBCe1, is a member of the bicarbonate transporter family and is involved in sodium-dependent bicarbonate

transport across the basolateral membrane of both absorptive and secretory epithelia (Gross and Kurtz, 2002). NBCe1 has two major variants that are spliced from the *SLC4A4* gene using different promoter sites (Abuladze et al., 2000); NBCe1-A was first cloned from the kidney of salamander (Romero et al., 1997) and human (Burnham et al., 1997), while NBCe1-B was cloned from human pancreas (Abuladze et al., 1998). Human NBCe1-A and -B are identical over the 994 amino acids at the C-terminus, but have unique N-terminal sequences and tissue expression varies (Abuladze et al., 2000). The two variants are generally referred to as kNBC and pNBC, which denotes the tissue from which they were first isolated, kidney and pancreas, respectively, and they are localised on the basolateral membrane of epithelial cells (Marino et al., 1999; Schmitt et al., 1999). The direction of bicarbonate transport is determined by the stoichiometry of the different transporters, which is thought to be tissue dependent, and the gradients for  $\text{Na}^+$  and  $\text{HCO}_3^-$  across the basolateral membrane (Gross et al., 2001). In general, pNBC is recognised as a secretory variant, whereas kNBC as an absorptive variant.

We have previously shown that the electrogenic secretory response of the possum ileum does not involve  $\text{Cl}^-$  secretion, and proposed that it involves  $\text{HCO}_3^-$  secretion (Bartolo et al., 2009). In the current study we have tested this proposal. We have used the Ussing technique to identify the source of  $\text{HCO}_3^-$  secreted by the possum ileum, discriminating between the transport of  $\text{HCO}_3^-$  across the basolateral membrane and hydration of  $\text{CO}_2$  by carbonic anhydrase, and provided a preliminary identification of the transporter involved by characterising the pharmacology of the secretory response. Also we have cloned and sequenced possum p- and kNBC and determined their distribution within the ileal epithelium in order to identify the specific variant involved in the secretory response of this tissue in the common Australian brushtail possum, a metatherian mammal.

## MATERIALS AND METHODS

### Animals and tissue collection and preparation

Adult Australian common brushtail possums, *Trichosurus vulpecula* Kerr 1792, were used in this study. They had a live weight greater than 2 kg, and were trapped and housed as previously described (Butt et al., 2002b). All experimental procedures were performed with the approval of the AgResearch Invermay and Otago University Animal Ethics Committees according to the Animal Welfare Act, 1999. Male and female animals were used in this study to exclude any sex bias. All tissues used in the current study were prepared as previously described (Bartolo et al., 2009).

### Measurements of epithelial transport

The secretory response was quantified as the change in short circuit current ( $I_{sc}$ ) in response to prostaglandin  $\text{E}_2$  ( $\text{PGE}_2$ ), forskolin or carbachol (CCH). To reduce variability in the responses, all tissues were pre-treated with  $1 \mu\text{mol l}^{-1}$  serosal tetrodotoxin (TTX) to inhibit neurally mediated spontaneous secretion (Bartolo et al., 2009).  $I_{sc}$  and transepithelial resistance ( $R_t$ ) were determined as previously described (Butt et al., 2002b; Butt et al., 2002a). Briefly, after removal of the ileum from the animal and flushing of the luminal contents, the underlying muscle and connective tissue were removed by blunt dissection and the epithelium mounted as a flat sheet in the Ussing chamber and constantly short-circuited. The Ringer's solutions employed in the Ussing chamber experiments are summarised in Table 1. TTX was purchased from Alomone Labs. (Jerusalem, Israel), while all other reagents were purchased from Sigma Aldrich (St Louis, MO, USA). Concentrated stocks of TTX and CCH were prepared in deionised water, forskolin in dimethyl sulphoxide (DMSO),  $\text{PGE}_2$  in ethanol and 5-(*N*-ethyl-*N*-isopropyl) amiloride (EIPA) in methanol. These drugs were then added as small aliquots of stock solutions to the appropriate side of the tissues. Control experiments demonstrated that equivalent volumes of vehicle had no effect. Acetazolamide was dissolved in a  $\text{NaHCO}_3$  solution and this solution was used to prepare a Ringer's solution containing  $1 \text{ mmol l}^{-1}$  acetazolamide. DIDS was prepared as a  $10 \text{ mmol l}^{-1}$  stock in Ringer's solution (hereafter referred to as Ringer's) and this was used to replace the appropriate volume of Ringer's in the reservoirs, to give a final concentration of  $1 \text{ mmol l}^{-1}$ . Amiloride was added as a small aliquot of dry powder directly to the serosal chamber to give a final concentration of  $1 \text{ mmol l}^{-1}$ .

### Cloning and expression of pancreatic and kidney NBC isoforms

RNA isolation and cDNA synthesis were as described previously (Bartolo et al., 2009). RACE PCR was carried out using a GeneRacer RACE kit (3' RACE; Invitrogen, Auckland, New Zealand) or a BD SMART RACE kit (5' RACE; Clontech Laboratories, Mountain View, CA, USA) according to the manufacturers protocol. Since NBC variants can be involved in either absorption or secretion of  $\text{HCO}_3^-$ , it was important to determine if both p- and kNBC were expressed in the possum ileum.

Primers (NBC-For 1 and NBC-Rev 1, see Table 2 for a summary of primer sequences) were designed from highly conserved regions of the pNBC from human (acc. no. AF011390.1), rat

Table 1. Composition of the Ringer's solutions (in  $\text{mmol l}^{-1}$ ) employed in the Ussing chamber studies

| Solution                        | 1<br>$\text{NaCl/HCO}_3^-$          | 2<br>$\text{Cl}^-$ free             | 3<br>$\text{HCO}_3^-$ free | 4<br>$\text{Na}^+$ free             |
|---------------------------------|-------------------------------------|-------------------------------------|----------------------------|-------------------------------------|
| NaCl                            | 110                                 | 0                                   | 110                        | 0                                   |
| Sodium gluconate                | 0                                   | 110                                 | 25                         | 0                                   |
| <i>N</i> -methyl-D-glucamine Cl | 0                                   | 0                                   | 0                          | 110                                 |
| KCl                             | 5                                   | 0                                   | 5                          | 5                                   |
| Potassium gluconate             | 0                                   | 5                                   | 0                          | 0                                   |
| $\text{MgSO}_4$                 | 0.5                                 | 0.5                                 | 0.5                        | 0.5                                 |
| $\text{CaCl}_2$                 | 1                                   | 0                                   | 1                          | 1                                   |
| Calcium gluconate               | 0                                   | 1                                   | 0                          | 0                                   |
| $\text{NaHCO}_3$                | 25                                  | 25                                  | 0                          | 0                                   |
| Choline bicarbonate             | 0                                   | 0                                   | 0                          | 25                                  |
| Hepes/Tris                      | 10                                  | 10                                  | 10                         | 10                                  |
| Pyruvate/glutamine              | 4                                   | 4                                   | 4                          | 4                                   |
| Gas                             | 95% $\text{O}_2$ : 5% $\text{CO}_2$ | 95% $\text{O}_2$ : 5% $\text{CO}_2$ | 100% $\text{O}_2$          | 95% $\text{O}_2$ : 5% $\text{CO}_2$ |
| pH                              | 7.4                                 | 7.4                                 | 7.4                        | 7.4                                 |

Table 2. PCR primer sequences for amplification of possum NBCs

| Primer name                        | Primer sequence (5'-3')      |
|------------------------------------|------------------------------|
| Primers for cloning and expression |                              |
| NBC-For 1                          | ATCAGTGATTTTGCCATTAT         |
| NBC-Rev 1                          | ATGTGAGCAATGGAGATGAC         |
| NBC-For 2                          | GCCTTGCTGGTCACCATCCTGATT     |
| NBC-Rev 2                          | TGGGCTACTTGCACTGGAGA         |
| pNBC-For 1                         | CAARCTGGAGGAGCGACGGAAG       |
| kNBC-For 1                         | ATCCACCCWRTSTTTAACC          |
| kNBC-Rev 1                         | CCGAGGTA AAAATACTACGGTTAAAGA |
| pNBC-For 2                         | ATGGAGGATGAAGCCGTCCTG        |
| kNBC-For 2                         | ACCAAATTGAAGCTGGGATCT        |
| Primers for <i>in situ</i> probe   |                              |
| Forward                            | TGGAGGATGAAGCTGTCCTG         |
| Reverse                            | TGAGTGGTTGAGGATGCTAC         |

(AF107265.1), mouse (NM\_018760.2) and rabbit (AF149418) that are common to the respective kNBC sequence of each species. Using ileal cDNA as a template, these primers amplified a 377 bp cDNA that was then used to design possum-specific primers for RACE PCR. The NBC-For 2 primer was used in 3' RACE PCR using ileal cDNA made with the GeneRacer RACE kit (Invitrogen, Auckland, New Zealand). Attempts to amplify the 5' end of NBC from the possum ileum using 5' RACE were unsuccessful. However, we designed a forward primer, pNBC-For 1, on a highly conserved region in the 5' UTR of human and mouse pNBC sequences. This primer was then used with NBC-Rev 2 in PCR to amplify a 711 bp amplicon of pNBC.

Since it was probable that kNBC was expressed at low levels in intestinal tissues (Seidler et al., 2000; Praetorius et al., 2001), we amplified and sequenced kNBC using possum kidney cDNA. A forward primer (kNBC-For 1) was designed within the coding region of possum, *Monodelphis domestica* kNBC from sequence data obtained from the Ensembl genome database ([www.ensembl.org/Monodelphis\\_domestica](http://www.ensembl.org/Monodelphis_domestica)). This primer was used with the NBC-Rev 2 primer in PCR, and produced an amplicon of the expected size (498 bp) that was used to design a primer for use in 5' RACE PCR. The 5' end of possum kNBC was amplified using the kNBC-Rev 1 and the BD SMART RACE kit (Clontech Laboratories), according to the manufacturer's instructions.

All RACE PCRs were carried out using a touchdown PCR program, as per the BD SMART RACE kit instructions (Clontech Laboratories). All other PCR reactions were carried out using the following cycling parameters: initial denaturation at 94°C for 60 s, followed by 35 cycles of denaturation at 94°C for 45 s, annealing at 55°C for 45 s and extension at 72°C for 60 s. A final extension was carried out at 72°C for 10 min. The resultant products were sequenced and submitted to the NCBI GenBank. Alignments of possum NBC sequences were carried out to determine identity with human sequences using ClustalW2 (<http://www.ebi.ac.uk/tools/clustalw/>).

To determine which variants of NBC were expressed in the possum ileum, forward primers that targeted the unique 5' ends of p- and kNBC were used, whereas the reverse primer targeted a region of sequence common to both possum p- and kNBC. The forward primers were pNBC-For 2 and kNBC-For 2 and the reverse primer was NBC-Rev 2 (Table 2).

#### Western blot analysis of NBC

Crude membrane extracts were obtained as described previously (Bartolo et al., 2009) and the samples separated by SDS-polyacrylamide gel electrophoresis in 7.5% polyacrylamide gels and

electroblotted onto a PVDF membrane (GE Healthcare Biosciences, Auckland, NZ). Membranes were blocked with 5% (w/v) skimmed milk powder in Tris-buffered saline containing 0.1% Nonidet-P40 (TBS-NP40) for 1 h, and then incubated with a 1:2000 dilution of rabbit anti-rat NBC serum for 2 h. The NBC antiserum was kindly donated by Dr Bernard Schmitt, Department of Physiology, Otago University, New Zealand (Schmitt et al., 1999). Membranes were then washed with TBS-NP40 and incubated with 1:6000 donkey anti-rabbit horseradish-peroxidase-conjugated secondary antibody (GE Healthcare Biosciences, Auckland, NZ) for 2 h. The specificity of the NBC antibody was determined by preabsorption with the control peptide for 1 h prior to incubating the membranes. Antibodies were detected using enhanced chemiluminescence (GE Healthcare Biosciences, Auckland, NZ).

#### Localisation of pNBC mRNA by *in situ* hybridisation

Cellular localisation of pNBC mRNA in the ileum was determined using an *in situ* hybridisation (ISH) protocol as described previously (Bartolo et al., 2009). The probe used for ISH experiments was amplified from possum ileum cDNA using a primer pair (see Table 2) that generated a 252 bp cDNA that was cloned using the Promega pGem<sup>®</sup> T Easy vector system (Promega Corporation, Madison, WI, USA). [<sup>33</sup>P]dUTP (NZ Scientific, Auckland, New Zealand)-labelled sense and antisense probes were transcribed using an *in vitro* transcription kit (Riboprobe<sup>®</sup> *in vitro* transcription systems, Promega Corporation, Madison, WI, USA) according to the manufacturer's instructions. Hybridisation and detection of the probe were carried out as described previously (Bartolo et al., 2009).

#### Immunolocalisation of NBC

Ileal tissue samples were embedded in OCT compound (Siemens Medical Solutions, Erlangen, Germany) and snap frozen in isopentane that was pre-cooled in liquid nitrogen. Sections (10 µm) were placed on slides coated with 2% 3-aminopropyltriethoxysilane (Sigma Aldrich, St Louis, MO, USA), air dried for 10 min and stored at -80°C until required. Sections were prepared for immunohistochemistry by warming to room temperature, rinsing in PBS (in mmol l<sup>-1</sup>: 137 NaCl, 8.1 Na<sub>2</sub>HPO<sub>4</sub> and 1.9 KH<sub>2</sub>PO<sub>4</sub>, 2.7 KCl; pH 7.4) for 5 min and fixing in 0.4% paraformaldehyde for 10 min. The sections were blocked in 1% donkey serum in PBS for 30 min, and then incubated with rabbit anti-rat NBC (diluted 1:400 in PBS) for 2 h. The sections were then washed in PBS and incubated with FITC-conjugated donkey anti-rabbit IgG (diluted 1:200 in PBS; Jackson ImmunoResearch Laboratories, PA, USA) for 2 h, followed by incubation with DAPI (Sigma Aldrich; 100 ng ml<sup>-1</sup> in PBS) for 20 min. The sections were then washed in PBS and mounted in Vectashield<sup>®</sup> mounting medium (Vector Laboratories, Burlingame, CA, USA). The specificity of staining was determined by preabsorbing the primary antibody with the control peptide for 1 h before adding the antibody to the sections. The sections were examined and photographed using a confocal scanning laser system (Zeiss 510 LSM; Carl Zeiss GmbH, Jena, Germany).

#### Statistics

Results of electrophysiological experiments are presented as either individual recordings or as the mean ± standard error (s.e.m.); *N*, number of animals. Differences between means were tested, where appropriate, with either the unpaired two-tailed Student's *t*-test or one-way ANOVA with a Bonferroni or Dunnett's *post-hoc* test as indicated in the figure legends. Differences were considered to be statistically significant where *P* < 0.05.

## RESULTS

## Ion dependence of secretory response

Previously we have demonstrated that in the possum ileum, secretagogues stimulate an increase in  $I_{sc}$  that is dependent upon  $\text{HCO}_3^-$ , but independent of  $\text{Cl}^-$ , using Ussing chamber experiments (Bartolo et al., 2009). The total independence of  $\text{Cl}^-$  eliminates the possibility that the increase in  $I_{sc}$  induced by secretagogues in the possum ileum involves  $\text{Cl}^-$  secretion driven by a  $\text{HCO}_3^-$ -dependent process. Rather it suggests that the response involves  $\text{HCO}_3^-$  secretion. To investigate this further, we considered the ion dependence of this process in more detail. Firstly, we confirmed that the secretory response was independent of  $\text{Cl}^-$ , as shown previously (Bartolo et al., 2009).

Symmetrical replacement of  $\text{Cl}^-$  with the impermeant anion gluconate in the Ringer's solution (solution 2; Table 1) had little

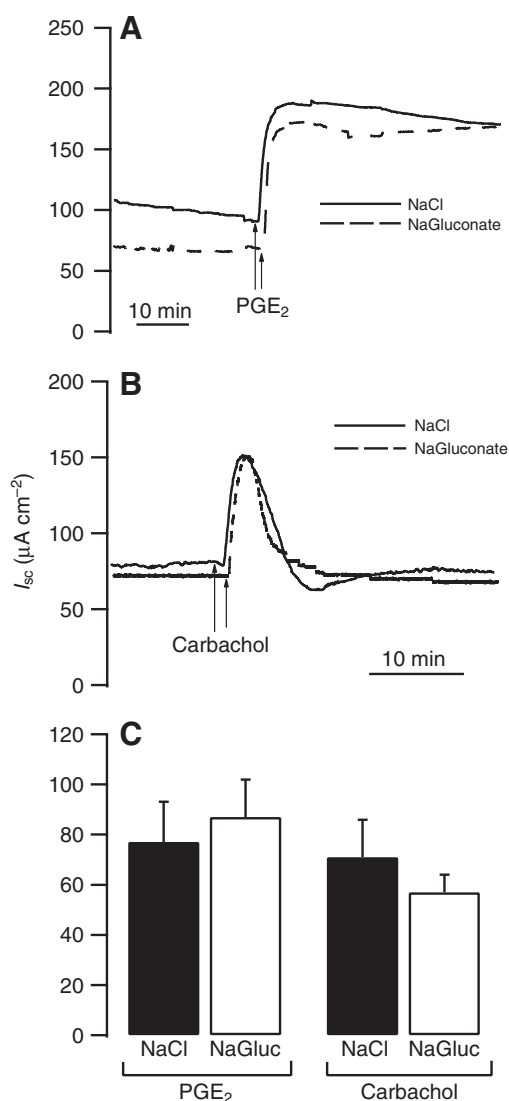

Fig. 1. Symmetrical (mucosal and serosal) replacement of  $\text{Cl}^-$  with the impermeant anion gluconate (Gluconate, solution 2, Table 1) does not affect the short circuit current ( $I_{sc}$ ) stimulated by  $\text{PGE}_2$  ( $1 \mu\text{mol l}^{-1}$ , serosal) or carbachol ( $100 \mu\text{mol l}^{-1}$ , serosal). (A,B) Representative experiments showing the effect of  $\text{Cl}^-$  replacement with sodium gluconate on the response to  $\text{PGE}_2$  (A) or carbachol (B). (C) Summary of the effects of  $\text{Cl}^-$  replacement with gluconate on the response to  $\text{PGE}_2$  and carbachol. All values are mean  $\pm$  s.e.m.,  $N=8$  for each.

effect on the response to  $\text{PGE}_2$  or CCH (Fig. 1), which stimulate  $I_{sc}$  via increases in intracellular cAMP and  $\text{Ca}^{2+}$ , respectively.  $\text{PGE}_2$  resulted in a sustained increase in  $I_{sc}$  of comparable magnitude in tissues bathed in both NaCl and sodium gluconate Ringer's. Similarly, CCH stimulated a transient increase in  $I_{sc}$  of comparable magnitude (Fig. 1) and duration (control,  $8.3 \pm 0.6$  min;  $\text{Cl}^-$ -free Ringer's  $7.6 \pm 0.7$  min) in tissues bathed in the two Ringer's solutions. By contrast, the responses to  $\text{PGE}_2$  and CCH were highly dependent upon  $\text{HCO}_3^-/\text{CO}_2$ , since the replacement of  $\text{HCO}_3^-/\text{CO}_2$  (solution 3; Table 1) in both the mucosal and serosal bathing solutions markedly reduced the secretagogue-stimulated increases in  $I_{sc}$  (Fig. 2). However, this effect was entirely dependent on the replacement of  $\text{HCO}_3^-/\text{CO}_2$  on the serosal side of the tissue. The removal of  $\text{HCO}_3^-/\text{CO}_2$  from the mucosal solution alone had little effect on the response to either  $\text{PGE}_2$  or CCH, whereas removal of serosal  $\text{HCO}_3^-/\text{CO}_2$  inhibited the responses to a comparable extent as removal of both mucosal and serosal  $\text{HCO}_3^-/\text{CO}_2$ . The secretory responses were also profoundly dependent upon  $\text{Na}^+$ , since the replacement of  $\text{Na}^+$  in the mucosal and serosal bathing solutions with *N*-methyl-D-glucamine (NMDG; solution 4; Table 1) markedly inhibited both the cAMP-stimulated and the  $\text{Ca}^{2+}$ -stimulated increase in  $I_{sc}$  (Fig. 3). Collectively, these data indicate that secretagogues stimulate a  $\text{Cl}^-$ -independent, but  $\text{Na}^+$ - and  $\text{HCO}_3^-$ -dependent increase in  $I_{sc}$  in the ileum of the possum, consistent with electrogenic  $\text{HCO}_3^-$  secretion.

The pharmacology of the  $\text{HCO}_3^-$  secretory response

The  $\text{HCO}_3^-$  secreted by epithelia is either transported into the cell across the basolateral membrane by  $\text{Na}^+/\text{HCO}_3^-$  cotransporters (NBC) or generated within the cell through the hydration of  $\text{CO}_2$  by carbonic anhydrase (Steward et al., 2005). To determine the contribution of these two processes to the secretion of  $\text{HCO}_3^-$  in the possum ileum, we first investigated the effect of acetazolamide, which inhibits the hydration of  $\text{CO}_2$  by carbonic anhydrase (Wu et al., 1998), on the  $I_{sc}$  stimulated by  $\text{PGE}_2$  and CCH. Paired tissues from each animal were mounted in the Ussing chamber and one was incubated with  $1 \text{ mmol l}^{-1}$  mucosal and serosal acetazolamide for 60 min to inhibit carbonic anhydrase activity. The tissues were then stimulated with either  $\text{PGE}_2$  or CCH. In the presence of acetazolamide,  $\text{PGE}_2$  stimulated a sustained increase in  $I_{sc}$  of comparable magnitude to that seen in the control tissues ( $\Delta I_{sc}$  control =  $81 \pm 15 \mu\text{A cm}^{-2}$ , acetazolamide =  $76 \pm 11 \mu\text{A cm}^{-2}$ ;  $N=8$ ). Similarly, the change in  $I_{sc}$  stimulated by CCH following pre-treatment with acetazolamide was of similar magnitude ( $\Delta I_{sc}$  =  $55 \pm 9 \mu\text{A cm}^{-2}$ ) as in the absence of acetazolamide ( $\Delta I_{sc}$  =  $61 \pm 10 \mu\text{A cm}^{-2}$ ) and both responses were of comparable duration (duration control,  $10 \pm 1.1$  min; duration plus acetazolamide,  $10 \pm 0.7$  min,  $N=7$ ). Thus acetazolamide, at a dose in excess of that shown to inhibit carbonic anhydrase-dependent  $\text{HCO}_3^-$  secretion in the eutherian pancreas (Cheng et al., 1998), had no effect on the secretory current in the possum ileum, suggesting that the hydration of  $\text{CO}_2$  contributes little to  $\text{HCO}_3^-$  secretion in the ileum. This was supported by the observation that the addition of serosal amiloride also had little effect on the  $\text{PGE}_2$ -stimulated response. The hydration of  $\text{CO}_2$  by carbonic anhydrase generates both  $\text{HCO}_3^-$  and  $\text{H}^+$  ions and the extrusion of the  $\text{H}^+$  ions across the basolateral membrane by the  $\text{Na}^+/\text{H}^+$  exchanger NHE1, maintains the driving force for  $\text{HCO}_3^-$  secretion (Novak and Greger, 1988). However,  $1 \text{ mmol l}^{-1}$  serosal amiloride, which inhibits NHE1 activity (Harris and Fliegel, 1999), had little effect on the  $\text{PGE}_2$ -stimulated increase in  $I_{sc}$  (Fig. 4). Similar results were obtained following stimulation with forskolin and with the use of EIPA ( $100 \mu\text{mol l}^{-1}$ , serosal; data not shown),

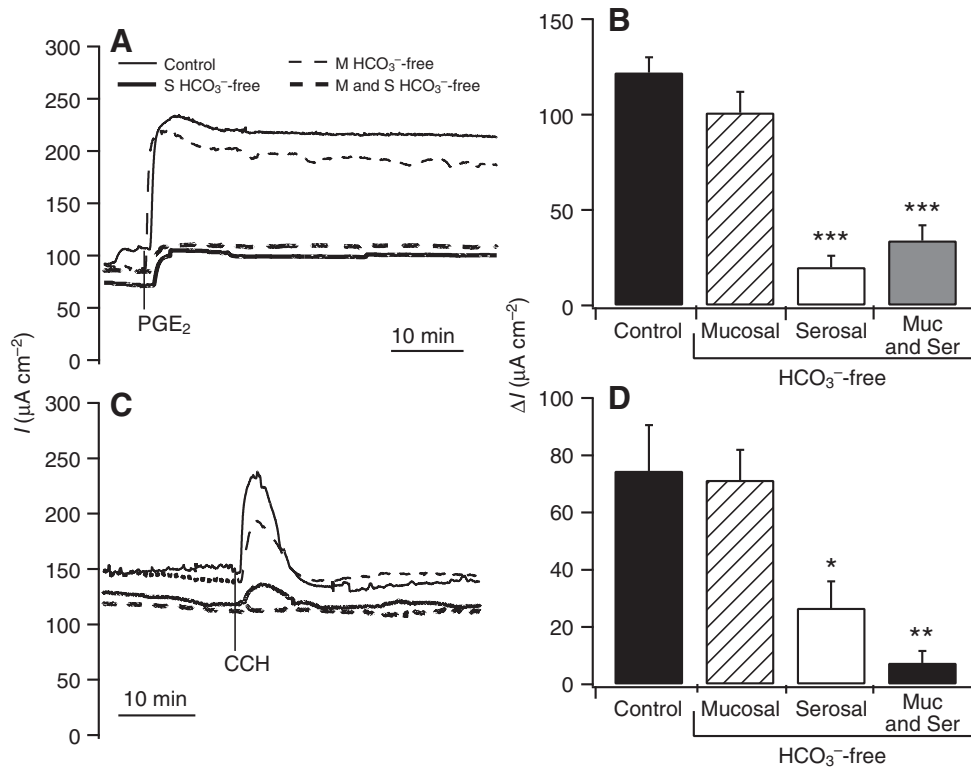

Fig. 2. The effect of replacement of  $\text{HCO}_3^-$  in the mucosal (M), serosal (S) or both mucosal and serosal (M and S) solutions on the response of the ileum to either  $\text{PGE}_2$  or carbachol. In each case four tissues from the same animal were used. One tissue (control) was bathed in  $\text{NaCl}/\text{HCO}_3^-$  Ringer's (solutions 1, Table 1) on both sides, and one (M and S  $\text{HCO}_3^-$ -free) in  $\text{HCO}_3^-$ -free  $\text{NaCl}$  Ringer's (solution 3, Table 1) on both sides. The remaining two tissues were bathed in  $\text{HCO}_3^-$ -free  $\text{NaCl}$  Ringer's on the mucosal (M  $\text{HCO}_3^-$ -free) or serosal (S  $\text{HCO}_3^-$ -free) on one side and  $\text{NaCl}/\text{HCO}_3^-$  Ringer's on the other side. All tissues were then stimulated with either  $\text{PGE}_2$  ( $1 \mu\text{mol l}^{-1}$ , serosal) or carbachol (CCH,  $100 \mu\text{mol l}^{-1}$ , serosal). (A) A representative experiment showing the different responses to  $\text{PGE}_2$ . (B) The mean change in transepithelial current ( $\Delta I$ ) in eight identical experiments, showing that the  $\text{PGE}_2$ -stimulated response was dependent upon serosal  $\text{HCO}_3^-$ . (C) A representative experiment showing the different responses to carbachol (CCH). (D) A summary of eight experiments showing that the mean  $\Delta I$  stimulated by CCH was also dependent upon serosal  $\text{HCO}_3^-$ . All values are mean  $\pm$  s.e.m. \*A significant difference from the response in  $\text{NaCl}$  Ringer's; one-way ANOVA with a Dunnett's *post-hoc* test. \* $P < 0.05$ , \*\* $P < 0.01$ , \*\*\* $P < 0.001$ .

an amiloride analogue specific for  $\text{Na}^+/\text{H}^+$  exchangers (Noel and Pouyssegur, 1995).

The absence of an effect of acetazolamide and amiloride imply that the secretory response is dependent upon a basolateral  $\text{Na}^+/\text{HCO}_3^-$  cotransporter. To support this conclusion we investigated the effect of serosal DIDS, which inhibits  $\text{HCO}_3^-$ -dependent transporters, such as the NBCs (Culliford et al., 2003). Following stimulation of the  $I_{sc}$  with  $\text{PGE}_2$ , serosal DIDS ( $1 \text{ mmol l}^{-1}$ ) completely inhibited the  $\text{PGE}_2$ -stimulated  $I_{sc}$  increase, whereas it had little effect on the spontaneous  $I_{sc}$  (Fig. 5A,B). Similarly, pre-treatment of paired tissues from the same animal with  $1 \text{ mmol l}^{-1}$  serosal DIDS eliminated the  $I_{sc}$  response to CCH (Fig. 5C,D). Similar effects of DIDS were seen when the tissues were stimulated with either  $\text{PGE}_2$  or CCH in  $\text{Cl}^-$ -free Ringer's (data not shown).

#### Identification of possum NBC variants and detection of NBC protein in the ileum

Collectively the physiological data indicate that  $\text{HCO}_3^-$  secretion in the possum ileum is dependent upon a NBC located in the basolateral membrane of the secretory cells. Therefore, we investigated whether the possum ileum expresses a NBC, in particular pancreatic (p)NBC which is associated with  $\text{HCO}_3^-$  secretion by eutherian epithelia (Praetorius et al., 2001; Bachmann et al., 2003; Steward et al., 2005). Initially we cloned and sequenced

possum pNBC from ileal tissue and (k)NBC from kidney and submitted the sequences to the NCBI data bank, under the accession numbers EU159119.2 and EU192930 for pNBC and kNBC, respectively.

Possum pNBC was 1070 amino acids long, whereas kNBC was 1028 amino acids long. The C-terminal 985 amino acids of possum p- and kNBC share very high sequence identity, as there are only two amino acids that are different, both of which are the result of single nucleotide substitutions. However, the N-terminal 85 amino acids of possum pNBC and the N-terminal 43 amino acids of possum kNBC have very low sequence identity, which is a characteristic of the two variants in other species (Abuladze et al., 2000). The deduced amino acid sequence of possum pNBC shares 95.0% sequence identity with human pNBC (accession number AAC39840), whereas possum kNBC shares 93.2% sequence identity to human kNBC (accession number AAC51645). The N-terminus of possum pNBC has a high sequence identity to the N-terminus of human pNBC (94.1%; Fig. 6A), but the N-terminus of possum kNBC was only 56.1% similar to the N-terminus of human kNBC (Fig. 6B).

In order to determine whether both NBC variants are expressed in the possum ileum we used specific primers that target the N-terminal region of possum p- and kNBC in PCR. A 712 bp partial cDNA of possum pNBC was clearly amplified from ileal cDNA with the pNBC-specific primers (Fig. 6C). A 721 bp partial cDNA

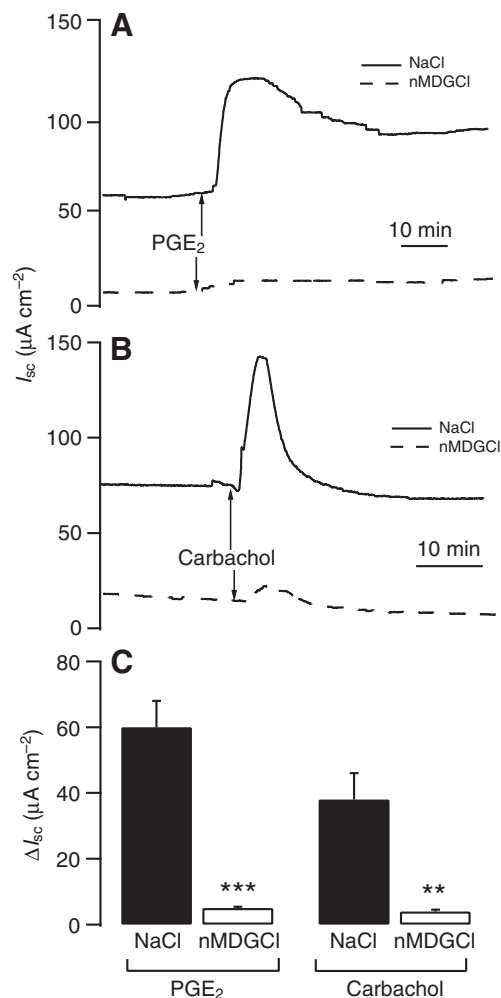

Fig. 3. Symmetrical (mucosal and serosal) replacement of Na<sup>+</sup> with the impermeant cation *N*-methyl-D-glucamine (nMDG<sup>+</sup>, Solution 4, Table 1) inhibits the increase in short circuit current ( $I_{sc}$ ) stimulated by PGE<sub>2</sub> (1 mmol l<sup>-1</sup>, serosal) or carbachol (100  $\mu\text{mol l}^{-1}$ , serosal) in the ileum. Representative experiments showing the effect of Na<sup>+</sup> replacement on the response to PGE<sub>2</sub> (A) or carbachol (B). (C) Summary of the effects of Na<sup>+</sup> replacement on the change in  $I_{sc}$  ( $\Delta I_{sc}$ ) stimulated by PGE<sub>2</sub> or carbachol. All values are mean  $\pm$  s.e.m.,  $N=7$  for each. \*A significant difference from the response in NaCl Ringer's solution. \*\* $P<0.01$ ; \*\*\* $P<0.0001$ , Student's *t* test.

was also amplified from the ileum using kNBC-specific primers, but the kNBC amplicon was very faint (Fig. 6C). The use of the same primer pair on kidney cDNA resulted in the amplification of a greater abundance of cDNA, which was confirmed as kNBC by sequencing (data not shown). Using ileal RNA as a template for PCR confirmed that we were not amplifying genomic DNA with the kNBC primers (Fig. 6C). These data suggest that both pNBC and kNBC are expressed in the possum ileum, although it would appear that pNBC is the main variant that is expressed.

Consistent with the PCR results we were able to detect NBC protein in the ileal epithelium of the possum. The anti-NBC antibody we used was raised in rabbit against a C-terminal region common to both rat p- and kNBC (Schmitt et al., 1999), thus it did not discriminate between the two variants. This antibody detected possum NBC protein of approximately 130 kDa in size from ileal protein extracts (Fig. 6D). Possum NBC was not detected when the primary antibody was pre-absorbed with the control peptide.

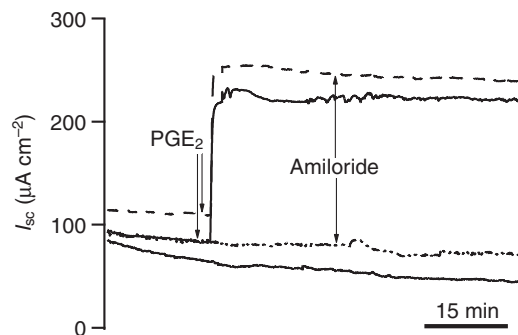

Fig. 4. Serosal amiloride had no effect on the PGE<sub>2</sub>-stimulated short circuit current ( $I_{sc}$ ) in the possum ileum. Four tissues from the same animal were mounted in Ussing chambers and pre-treated with TTX (1  $\mu\text{mol l}^{-1}$ , serosal). Then two of the tissues were stimulated with PGE<sub>2</sub> (1  $\mu\text{mol l}^{-1}$ , serosal), while the other two served as unstimulated controls. When the response to PGE<sub>2</sub> had reached a steady state, amiloride (1 mmol l<sup>-1</sup>, serosal) was added to one of the stimulated and one of the unstimulated tissues. Traces are representative of eight experiments.

#### Localisation of pNBC mRNA and NBC immunoreactivity in the possum ileum

In the intestine of eutherian mammals the transport proteins associated with absorption and secretion are predominately expressed in the villous and crypt cells, respectively (Field, 2003). To determine whether there was a discrete localisation of the NBC variants within the crypt–villous axis of the possum ileum we used probes specific for the N-terminal regions of pNBC and kNBC in *in situ* hybridisation studies. These experiments demonstrated a high level of pNBC mRNA expression in the crypts and base of the villous epithelium, with decreasing levels of expression along the length of the villi (Fig. 7A). With the use of a probe specific for kNBC we were unable to demonstrate the presence of appreciable levels of kNBC transcript in the possum ileum, although the probe clearly demonstrated high levels of kNBC transcript in the kidney (data not shown). These results support the conclusion that pNBC is the main variant expressed within the ileal epithelium.

The distribution of NBC immunoreactivity in the crypt–villous axis of the possum ileum indicated that it was present in the crypt cells and basal and mid regions of the villi, but it was absent from the tip of the villi (Fig. 7B,C). NBC immunoreactivity was the most intense in the mid region of the villi in the basolateral membrane of ileal epithelial cells (Fig. 7D). The discrepancy in the distribution of pNBC mRNA and NBC immunoreactivity in the crypt–villous axis of the possum ileum is probably because of the constant migration of intestinal epithelial cells from the crypts to the tip of the villi, where they are shed (Barker et al., 2008).

#### DISCUSSION

Electrogenic Cl<sup>-</sup> secretion has been shown to drive fluid secretion in elasmobranchs, birds and eutherian mammals and is the underlying mechanism driving fluid secretion in the small intestine of eutherian mammals (Sullivan and Field, 1991). This process is critically dependent upon the Na<sup>+</sup>/K<sup>+</sup>/2Cl<sup>-</sup> cotransporter, NKCC1, which is expressed in high levels in secretory epithelia (Russell, 2000). NKCC1 is located in the basolateral membrane of secretory epithelial cells and is the primary transporter that accumulates Cl<sup>-</sup> in the cells above equilibrium, thus driving the Cl<sup>-</sup> secretory process (Welsh, 1983; Greger et al., 1986). In the possum ileum, cAMP- and Ca<sup>2+</sup>-dependent secretagogues stimulate electrogenic secretory

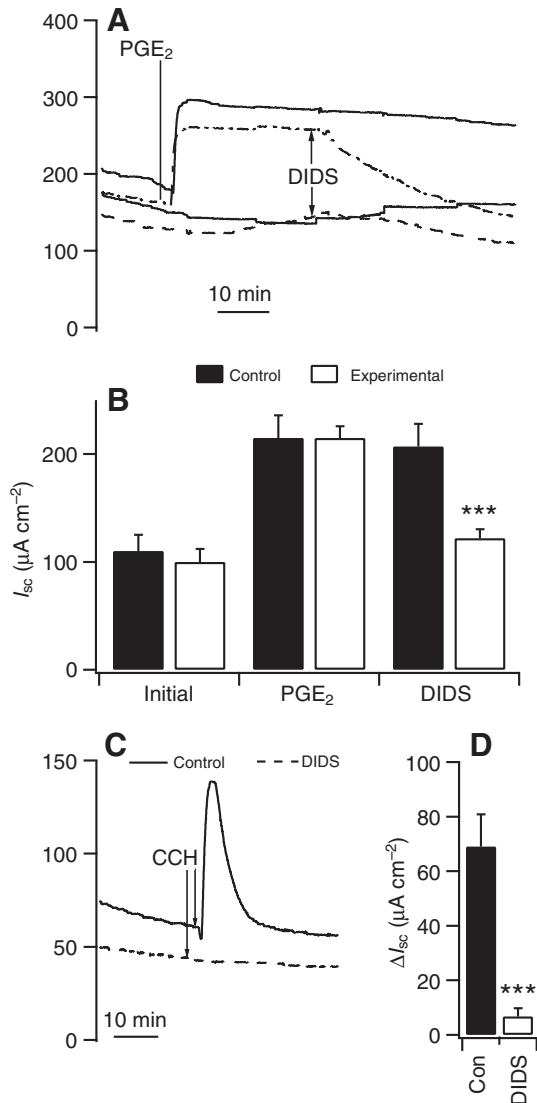

Fig. 5. Serosal 4,4'-diisothiocyano-stilbene-2,2'-disulfonate (DIDS) inhibited the short circuit current ( $I_{sc}$ ) stimulated by either PGE<sub>2</sub> or carbachol (CCH). (A) A representative experiment showing that DIDS (1 mmol l<sup>-1</sup>) did not inhibit the spontaneous  $I_{sc}$ , but inhibited the PGE<sub>2</sub>-stimulated (1 μmol l<sup>-1</sup>, serosal)  $I_{sc}$ . Four tissues from the same animal were mounted in Ussing chambers and pre-treated with serosal TTX (1 μmol l<sup>-1</sup>). Two of the tissues were then stimulated with PGE<sub>2</sub>, and when the response had reached a steady state one stimulated and one unstimulated tissue were treated with DIDS. (B) A summary of the effect of PGE<sub>2</sub> and DIDS on the  $I_{sc}$  in the possum ileum. All values are mean ± s.e.m.,  $N=8$ . \*A significant difference from control tissues; one-way ANOVA with a Bonferroni *post-hoc* test, \*\*\* $P<0.001$ . (C) A representative experiment showing the effect of pre-treatment with serosal DIDS (1 mmol l<sup>-1</sup>) on the response to CCH (100 μmol l<sup>-1</sup> serosal). One of two tissues from the same animal was pre-treated with serosal DIDS for 30 min and then both tissues were stimulated with CCH. (D) A summary of the change in  $I_{sc}$  ( $\Delta I_{sc}$ ) stimulated by CCH in the presence and absence of serosal DIDS. Values are mean ± s.e.m.,  $N=8$ . \*A significant difference from control tissues, Student's *t*-test, \*\*\* $P<0.001$ .

responses that are qualitatively similar to the Cl<sup>-</sup> secretory responses seen in eutherian mammals. PGE<sub>2</sub> and, to a lesser extent, forskolin stimulate a sustained increase in  $I_{sc}$ , whereas the Ca<sup>2+</sup>-dependent secretagogue CCH stimulates a transient increase in  $I_{sc}$ . However, these responses do not involve electrogenic Cl<sup>-</sup> secretion as they

are independent of Cl<sup>-</sup> and are insensitive to bumetanide. Here we present evidence indicating that the electrogenic secretory response of the possum ileum involves electrogenic HCO<sub>3</sub><sup>-</sup> secretion driven by a basolateral Na<sup>+</sup>/HCO<sub>3</sub><sup>-</sup> cotransporter.

In the ileum of the possum the levels of expression of NKCC1 are relatively low compared with secretory epithelia in eutherian mammals (Bartolo et al., 2009). Consequently, the secretory responses seen in the possum ileum are independent of NKCC1 activity. Recently, it was demonstrated that in NKCC1 knockout mice and in colonic surface epithelial cells that do not express NKCC1, Cl<sup>-</sup> secretion was driven by HCO<sub>3</sub><sup>-</sup>-dependent accumulation of Cl<sup>-</sup> *via* a basolateral Cl<sup>-</sup>/HCO<sub>3</sub><sup>-</sup> exchanger (Jacob et al., 2001; Walker et al., 2002). Although the levels of expression of NKCC1 in the possum ileum are very low (Bartolo et al., 2009) it is unlikely that the secretory response involves Cl<sup>-</sup> secretion driven by a HCO<sub>3</sub><sup>-</sup>-dependent process since the complete replacement of Cl<sup>-</sup> in the bathing solution with an impermeant anion had little effect on secretion. By contrast, the removal of HCO<sub>3</sub><sup>-</sup>/CO<sub>2</sub> from the bathing solution profoundly inhibited the secretory responses. This dependence on serosal HCO<sub>3</sub><sup>-</sup>/CO<sub>2</sub>, combined with its total independence of Cl<sup>-</sup>, is consistent with the notion that, in the possum ileum, secretagogues stimulate electrogenic HCO<sub>3</sub><sup>-</sup> secretion.

In HCO<sub>3</sub><sup>-</sup>-secreting epithelia of eutherians, HCO<sub>3</sub><sup>-</sup> can be either generated by hydration of CO<sub>2</sub>, through the action of carbonic anhydrase (Jacob et al., 2000) or transported into the epithelial cells from the serosal solution (Ishiguro et al., 1996; Bachmann et al., 2003). The CO<sub>2</sub> that is hydrated by carbonic anhydrase is derived from either metabolic CO<sub>2</sub> or the diffusion of CO<sub>2</sub> into the cells from the bathing solution. However, in the possum ileum, acetazolamide, which inhibits carbonic anhydrase activity (Wu et al., 1998), had no effect on secretion, indicating that the hydration of CO<sub>2</sub> does not contribute to the secretory response. Furthermore, serosal amiloride had no effect on the secretory responses. The hydration of CO<sub>2</sub> generates both HCO<sub>3</sub><sup>-</sup> and H<sup>+</sup> ions. As a result, the activity of an amiloride-sensitive Na<sup>+</sup>/H<sup>+</sup> exchanger on the basolateral membrane of epithelial cells plays an integral role in the secretion of HCO<sub>3</sub><sup>-</sup> generated by carbonic anhydrase, since the extrusion of H<sup>+</sup> ions across the basolateral membrane maintains the driving force for HCO<sub>3</sub><sup>-</sup> secretion across the apical membrane (Novak and Greger, 1988).

Thus, it would appear that secretion by the possum ileum is primarily dependent upon serosal HCO<sub>3</sub><sup>-</sup>. This proposal is supported by the observation that the removal of HCO<sub>3</sub><sup>-</sup>/CO<sub>2</sub> from the serosal solution alone inhibited secretion to the same extent as removal from both sides. Indeed the dependence of the stimulated  $I_{sc}$  on Na<sup>+</sup>, serosal HCO<sub>3</sub><sup>-</sup> and its inhibition by serosal DIDS, suggest that in the possum ileum secretagogues stimulate electrogenic HCO<sub>3</sub><sup>-</sup> secretion, which is driven by a Na<sup>+</sup>/HCO<sub>3</sub><sup>-</sup> cotransporter on the basolateral membrane of the secretory cells. This was supported by the demonstration that NBC is expressed in the possum ileum and the NBC immunoreactivity was localised to the basolateral membrane of the ileal epithelial cells.

In eutherian epithelia the pancreatic (p) and kidney (k) variants of the electrogenic Na<sup>+</sup>/HCO<sub>3</sub><sup>-</sup> cotransporter (NBC) are associated with the transport of HCO<sub>3</sub><sup>-</sup> across the basolateral membrane of epithelial cells. However, these two variants of NBC have markedly different distributions and functions. kNBC is predominately located in epithelia of the kidney (Bok et al., 2001; Roussa et al., 2004), where it is involved in the reabsorption of HCO<sub>3</sub><sup>-</sup> (Boron et al., 1997). This cotransporter is located in the basolateral membrane of the proximal tubule epithelial cells and has a Na<sup>+</sup>:HCO<sub>3</sub><sup>-</sup> stoichiometry of 1:3. This stoichiometry, combined with the





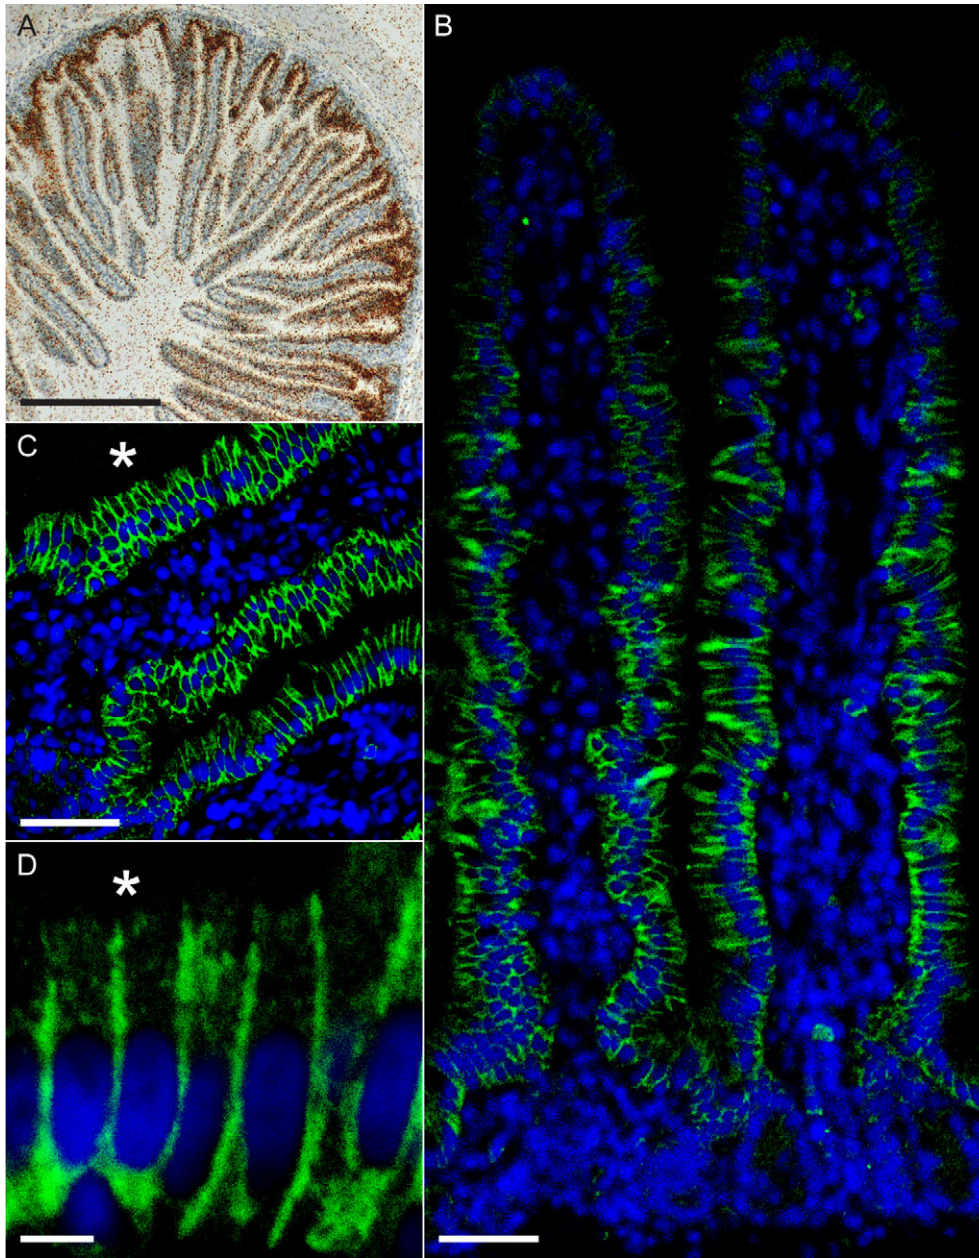

Fig. 7. Localisation of possum pNBC in the ileum using *in situ* hybridisation (A) and immunohistochemistry (B-D). (A) In the possum ileum, pNBC mRNA appeared to be primarily distributed in the crypts and at the base of villous epithelium, with a decreasing amount of pNBC mRNA along the crypt–villus axis towards the tip of the villi. (B,C) Using immunohistochemistry, we demonstrated that pNBC immunoreactivity (green) was present in the crypts, but was most intense in the mid-region of the villus epithelium (B,C), whereas very little pNBC immunoreactivity was detected at the tip of the villi (B). In the ileal epithelial cells that showed pNBC immunoreactivity, pNBC was located at the basolateral membrane (D). In C and D, an asterisk indicates the intestinal lumen. Scale bars, 500  $\mu\text{m}$  (A), 50  $\mu\text{m}$  (B,C) and 5  $\mu\text{m}$  (D).

the caecum and proximal colon. The possum is a hindgut fermenter (Hume, 1982), and microbial fermentation in the hindgut requires a suitable environment for microbial growth and absorption of short chain fatty acids that result from the fermentation process. This includes a fluid medium and sufficient buffering capacity to maintain pH within a favourable range (Rechkemmer et al., 1988). In ruminants,  $\text{HCO}_3^-$  ions derived from salivary secretion are an important buffer in the foregut fermentation chamber (Allen, 1997). In the absence of significant electrogenic secretion in the hindgut of the possum (Butt et al., 2002b), the electrogenic  $\text{HCO}_3^-$  secretion by the ileum may be an important means of not only regulating the luminal pH, but also ensuring a sufficient volume of fluid for microbial growth. By contrast, the proximal colon of eutherian hindgut fermenters is capable of both fluid and  $\text{HCO}_3^-$  secretion (Clauss, 1986; Sullivan, 1986; Hyun et al., 1994; Kawamata et al., 2006). Therefore, it may not be necessary to deliver similar volumes of  $\text{HCO}_3^-$ -rich fluid from the ileum. As a result, it may be sufficient

to elevate ileal  $\text{HCO}_3^-$  concentration primarily through  $\text{Cl}^-/\text{HCO}_3^-$  exchange, which will alter the composition of the luminal fluid, but will not drive net fluid secretion. Certainly, along the length of the small intestine of eutherian mammals there is a progressive rise in luminal  $\text{HCO}_3^-$  concentration and a reciprocal fall in intestinal  $\text{Cl}^-$  concentration as a result of  $\text{Cl}^-/\text{HCO}_3^-$  exchange (Argenzio, 1991). Furthermore, in the ileum of eutherian mammals  $\text{HCO}_3^-$  is secreted at a relatively low rate compared with the duodenum and proximal colon (Seidler et al., 1997; Seidler et al., 2000). Interestingly, possums are very efficient in the digestion of fibre in the hindgut, particularly when compared with eutherian hindgut fermenters (Wellard and Hume, 1981). Therefore, the specialisation seen in ileal  $\text{HCO}_3^-$  transport may be a feature unique to marsupials or the possum.

In conclusion, secretagogues stimulate an electrogenic secretory response in the ileum of the brushtail possum, which involves electrogenic  $\text{HCO}_3^-$  secretion and is dependent upon the activity of

the pancreatic variant of the electrogenic  $\text{Na}^+/\text{HCO}_3^-$  cotransporter, pNBC. This is different from the situation in eutherian mammals in which the dominant mechanism of secretion in the ileum involves electrogenic  $\text{Cl}^-$  secretion. This difference may reflect an evolutionary divergence of secretion mechanisms between marsupials and eutherians or, alternatively, it may reflect a specialised function of the possum ileum that increases the efficiency of nutrient metabolism.

We thank Sonya Mathieson for excellent technical assistance and Euan Thompson for the collection and maintenance of the possums. This work was supported by a University of Otago Research Grant, and grants from the Foundation for Research Science and Technology, the Animal Health Board Inc., and the National Research Centre for Possum Biocontrol.

## REFERENCES

- Abuladze, N., Lee, I., Newman, D., Hwang, J., Boorer, K., Pushkin, A. and Kurtz, I. (1998). Molecular cloning, chromosomal localization, tissue distribution, and functional expression of the human pancreatic sodium bicarbonate cotransporter. *J. Biol. Chem.* **273**, 17689-17695.
- Abuladze, N., Song, M., Pushkin, A., Newman, D., Lee, I., Nicholas, S. and Kurtz, I. (2000). Structural organization of the human NBC1 gene: kNBC1 is transcribed from an alternative promoter in intron 3. *Gene* **251**, 109-122.
- Allen, M. S. (1997). Relationship between fermentation acid production in the rumen and the requirement for physically effective fiber. *J. Dairy Sci.* **80**, 1447-1462.
- Argenzio, R. A. (1991). Comparative physiology of colonic electrolyte transport. In *Handbook of Physiology: The Gastrointestinal System*, vol. 4 (ed. S. G. Schultz), pp. 275-285. Bethesda, MD: American Physiological Society.
- Bachmann, O., Rossmann, H., Berger, U. V., Colledge, W. H., Ratcliff, R., Evans, M. J., Gregor, M. and Seidler, U. (2003). cAMP-mediated regulation of murine intestinal/pancreatic  $\text{Na}^+/\text{HCO}_3^-$  cotransporter subtype pNBC1. *Am. J. Physiol.* **284**, G37-G45.
- Balen, D., Ljubojevic, M., Breljak, D., Brzica, H., Zlender, V., Koepsell, H. and Sabolic, I. (2008). Revised immunolocalization of the  $\text{Na}^+/\text{D}$ -glucose cotransporter SGLT1 in rat organs with an improved antibody. *Am. J. Physiol.* **295**, C475-C489.
- Barker, N., van de Wetering, M. and Clevers, H. (2008). The intestinal stem cell. *Genes Dev.* **22**, 1856-1864.
- Bartolo, R., Harfoot, N., Gill, M., Demmers, K., McLeod, B. and Butt, A. G. (2009). Electrogenic  $\text{Cl}^-$  secretion does not occur in the ileum of the possum, *Trichosurus vulpecula*, due to low levels of NKCC1 expression. *J. Comp. Physiol. B*. doi:10.1007/s00360-009-0379-8.
- Bok, D., Schibler, M. J., Pushkin, A., Sassani, P., Abuladze, N., Naser, Z. and Kurtz, I. (2001). Immunolocalization of electrogenic sodium-bicarbonate cotransporters pNBC1 and kNBC1 in the rat eye. *Am. J. Physiol.* **281**, F920-F935.
- Boron, W. F., Hediger, M. A., Boulpaep, E. L. and Romero, M. F. (1997). The renal electrogenic  $\text{Na}^+/\text{HCO}_3^-$  cotransporter. *J. Exp. Biol.* **200**, 263-268.
- Burnham, C. E., Amlal, H., Wang, Z., Shull, G. E. and Soleimani, M. (1997). Cloning and functional expression of a human kidney  $\text{Na}^+/\text{HCO}_3^-$  cotransporter. *J. Biol. Chem.* **272**, 19111-19114.
- Butt, A. G., Mathieson, S. E. and McLeod, B. J. (2002a). Aldosterone does not regulate amiloride-sensitive  $\text{Na}^+$  transport in the colon of the Australian common brushtail possum, *Trichosurus vulpecula*. *J. Comp. Physiol. B* **172**, 519-527.
- Butt, A. G., Mathieson, S. E. and McLeod, B. J. (2002b). Electrogenic ion transport in the intestine of the Australian common brushtail possum, *Trichosurus vulpecula*: indications of novel transport patterns in a marsupial. *J. Comp. Physiol. B* **172**, 495-502.
- Cheng, H. S., Leung, P. Y., Chew, S. B. C., Leung, P. S., Lam, S. Y., Wong, W. S., Wang, Z. D. and Chan, H. C. (1998). Concurrent and independent  $\text{HCO}_3^-$  and  $\text{Cl}^-$  secretion in a human pancreatic duct cell line (CAPAN-1). *J. Membr. Biol.* **164**, 155-167.
- Clauss, W. (1986). Electrolyte transport across rabbit late proximal colon. *Comp. Biochem. Physiol. A* **82**, 71-75.
- Culliford, S., Ellory, C., Lang, H. J., Englert, H., Staines, H. and Wilkins, R. (2003). Specificity of classical and putative  $\text{Cl}^-$  transport inhibitors on membrane transport pathways in human erythrocytes. *Cell. Physiol. Biochem.* **13**, 181-188.
- Dorwart, M. R., Shcheynikov, N., Wang, Y., Stippec, S. and Muallem, S. (2007). SLc26A9 is a  $\text{Cl}^-$  channel regulated by the WNK kinases. *J. Physiol. (Lond.)* **584**, 333-345.
- Field, M. (2003). Intestinal ion transport and the pathophysiology of diarrhea. *J. Clin. Invest.* **111**, 931-943.
- Gamba, G. (2005). Molecular physiology and pathophysiology of electroneutral cation-chloride cotransporters. *Physiol. Rev.* **85**, 423-493.
- Greger, R., Schlatter, E. and Gogelein, H. (1986). Sodium chloride secretion in the rectal gland of dogfish, *Squalus acanthias*. *News Physiol. Sci.* **1**, 134-136.
- Gross, E. and Kurtz, I. (2002). Structural determinants and significance of regulation of electrogenic  $\text{Na}^+/\text{HCO}_3^-$  cotransporter stoichiometry. *Am. J. Physiol.* **283**, F876-F887.
- Gross, E., Hawkins, K., Abuladze, N., Pushkin, A., Cotton, C. U., Hopfer, U. and Kurtz, I. (2001). The stoichiometry of the electrogenic sodium bicarbonate cotransporter NBC1 is cell-type dependent. *J. Physiol. (Lond.)* **531**, 597-603.
- Grubb, B. R. (1997). Ion transport across the murine intestine in the absence and presence of CFTR. *Comp. Biochem. Physiol.* **118A**, 277-282.
- Halm, D. R. and Frizzell, R. A. (1990). Intestinal chloride secretion. In *Textbook of Secretory Diarrhea* (ed. E. Leibel and M. E. Duffey), pp. 47-58. New York: Raven Press.
- Harris, C. and Fiegl, L. (1999). Amiloride and the  $\text{Na}^+/\text{H}^+$  exchanger protein: mechanism and significance of inhibition of the  $\text{Na}^+/\text{H}^+$  exchanger. *Int. J. Mol. Med.* **3**, 315-321.
- Hogan, D. L., Crombie, D. L., Isenberg, J. I., Svendsen, P., DeMuckadell, O. B. S. and Ainsworth, M. A. (1997). CFTR mediates cAMP- and  $\text{Ca}^{2+}$ -activated duodenal epithelial  $\text{HCO}_3^-$  secretion. *Am. J. Physiol.* **272**, G872-G878.
- Hume, I. D. (1982). *Digestive Physiology and Nutrition of Marsupials*. Cambridge: Cambridge University Press.
- Hwang, E. S., Hirayama, B. D. and Wright, E. M. (1991). Distribution of SGLT1  $\text{Na}^+/\text{glucose}$  cotransporter and message along the crypt-villus axis of rabbit small intestine. *Biochem. Biophys. Res. Commun.* **181**, 1208-1217.
- Hyun, C. S., Ahn, J., Minhas, B. S., Cragoe, E. J., Jr and Field, M. (1994). Ion transport in rabbit proximal colon: effects of sodium, amiloride, cAMP, and epinephrine. *Am. J. Physiol.* **266**, G1071-G1082.
- Isenberg, J. I., Ljungstrom, M., Safsten, B. and Flemstrom, G. (1993). Proximal duodenal enterocyte transport – evidence for  $\text{Na}^+/\text{H}^+$  and  $\text{Cl}^-/\text{HCO}_3^-$  exchange and  $\text{NaHCO}_3$  cotransport. *Am. J. Physiol.* **265**, G677-G685.
- Ishiguro, H., Steward, M. C., Lindsay, A. R. G. and Case, R. M. (1996). Accumulation of intracellular  $\text{HCO}_3^-$  by  $\text{Na}^+/\text{HCO}_3^-$  cotransport in interlobular ducts from guinea-pig pancreas. *J. Physiol. (Lond.)* **495**, 169-178.
- Jacob, P., Christiani, S., Rossmann, H., Lamprecht, G., Vieillard-Baron, D., Muller, R., Gregor, M. and Seidler, U. (2000). Role of  $\text{Na}^+/\text{HCO}_3^-$  cotransporter NBC1,  $\text{Na}^+/\text{H}^+$  exchanger NHE1, and carbonic anhydrase in rabbit duodenal bicarbonate secretion. *Gastroenterology* **119**, 406-419.
- Jacob, P., Rossmann, C. N., Weichert, A., Gregor, M. and Seidler, U. (2001). Multiple transport pathways are involved in cellular  $\text{Cl}^-$  uptake during colonic anion secretion. *Gastroenterology* **120**, A699-A699.
- Kawamata, K., Hayashi, H. and Suzuki, Y. (2006). Chloride-dependent bicarbonate secretion in the mouse large intestine. *Biomed. Res.* **27**, 15-21.
- Knickelbein, R. G., Aronson, P. S. and Dobbins, J. W. (1988). Membrane distribution of sodium hydrogen and chloride bicarbonate exchangers in crypt and villus cell membranes from rabbit ileum. *J. Clin. Invest.* **82**, 2158-2163.
- Lee, W. S., Kanai, Y., Wells, R. G. and Hediger, M. A. (1994). The high affinity  $\text{Na}^+/\text{glucose}$  cotransporter. Re-evaluation of function and distribution of expression. *J. Biol. Chem.* **269**, 12032-12039.
- MacLeod, R. J., Redican, F., Lembessis, P., Hamilton, J. R. and Field, M. (1996). Sodium-bicarbonate cotransport in guinea pig ileal crypt cells. *Am. J. Physiol.* **270**, C786-C793.
- Marino, C. R., Jeanes, V., Boron, W. F. and Schmitt, B. M. (1999). Expression and distribution of the  $\text{Na}^+/\text{HCO}_3^-$  cotransporter in human pancreas. *Am. J. Physiol.* **40**, G487-G494.
- Minhas, B. S. and Field, M. (1994). Localization of bicarbonate transport along the crypt-villus axis in rabbit ileum. *Gastroenterology* **106**, 1562-1567.
- Minhas, B. S., Sullivan, S. K. and Field, M. (1993). Bicarbonate secretion in rabbit ileum-electrogenicity, ion dependence, and effects of cyclic nucleotides. *Gastroenterology* **105**, 1617-1629.
- Noel, J. and Pouyssegur, J. (1995). Hormonal regulation, pharmacology, and membrane sorting of vertebrate  $\text{Na}^+/\text{H}^+$  exchanger isoforms. *Am. J. Physiol.* **268**, C283-C296.
- Novak, I. and Greger, R. (1988). Electrophysiological study of transport systems in isolated perfused pancreatic ducts: properties of the basolateral membrane. *Pflügers Arch.* **411**, 58-68.
- Ouloughlin, E. V., Hunt, D. M., Gaskin, K. J., Stiel, D., Bruzuzsack, I. M., Martin, H. C. O., Bambach, C. and Smith, R. (1991). Abnormal epithelial transport in cystic fibrosis jejunum. *Am. J. Physiol.* **260**, G758-G763.
- Poulsen, J. H., Fischer, H., Illek, B. and Machen, T. E. (1994). Bicarbonate conductance and pH regulatory capability of cystic fibrosis transmembrane conductance regulator. *Proc. Natl. Acad. Sci. USA* **91**, 5340-5344.
- Praetorius, J., Hager, H., Nielsen, S., Aalkjaer, C., Friis, U. G., Ainsworth, M. A. and Johansen, T. (2001). Molecular and functional evidence for electrogenic and electroneutral  $\text{Na}^+/\text{HCO}_3^-$  cotransporters in murine duodenum. *Am. J. Physiol.* **280**, G332-G343.
- Pushkin, A. and Kurtz, I. (2006). SLC4 base ( $\text{HCO}_3^-$ ,  $\text{CO}_3^{2-}$ ) transporters: classification, function, structure, genetic diseases, and knockout models. *Am. J. Physiol.* **290**, F580-F599.
- Reckemmer, G., Ronnau, K. and von Engelhardt, W. (1988). Fermentation of polysaccharides and absorption of short chain fatty acids in the mammalian hindgut. *Comp. Biochem. Physiol.* **90A**, 563-568.
- Romero, M. F., Hediger, M. A., Boulpaep, E. L. and Boron, W. F. (1997). Expression cloning and characterization of a renal electrogenic  $\text{Na}^+/\text{HCO}_3^-$  cotransporter. *Nature* **387**, 409-413.
- Romero, M. F., Fulton, C. M. and Boron, W. F. (2004). The SLC4 family of  $\text{HCO}_3^-$  transporters. *Pflügers Arch.* **447**, 495-509.
- Roussa, E., Nastainczyk, W. and Thevenod, F. (2004). Differential expression of electrogenic NBC1 (SLC4A4) variants in rat kidney and pancreas. *Biochem. Biophys. Res. Commun.* **314**, 382-389.
- Russell, J. M. (2000). Sodium-potassium-chloride cotransport. *Physiol. Rev.* **80**, 211-276.
- Schmitt, B. M., Biemesderfer, D., Romero, M. F., Boulpaep, E. L. and Boron, W. F. (1999). Immunolocalization of the electrogenic  $\text{Na}^+/\text{HCO}_3^-$  cotransporter in mammalian and amphibian kidney. *Am. J. Physiol.* **276**, F27-F38.
- Seidler, U., Blumenstein, I., Kretz, A., Vieillard-Baron, D., Rossmann, H., Colledge, W. H., Evans, M., Ratcliff, R. and Gregor, M. (1997). A functional CFTR protein is required for mouse intestinal cAMP-, cGMP- and  $\text{Ca}^{2+}$ -dependent  $\text{HCO}_3^-$  secretion. *J. Physiol. (Lond.)* **505**, 411-423.
- Seidler, U., Rossmann, H., Jacob, P., Bachmann, O., Christiani, S., Lamprecht, G. and Gregor, M. (2000). Expression and function of  $\text{Na}^+/\text{HCO}_3^-$  cotransporters in the gastrointestinal tract. In *Epithelial Transport and Barrier Function*, vol. 915 (ed. J. D. Schulzke and M. Fromm), pp. 1-14. Boston, MA: Blackwell.

- Sellers, Z. M., Mann, E., Smith, A., Ko, K. H., Giannella, R., Cohen, M. B., Barrett, K. E. and Dong, H.** (2008). Heat-stable enterotoxin of *Escherichia coli* (STa) can stimulate duodenal  $\text{HCO}_3^-$  secretion via a novel GC-C- and CFTR-independent pathway. *FASEB J.* **22**, 1306-1316.
- Spiegel, S., Phillipper, M., Rossmann, H., Riederer, B., Gregor, M. and Seidler, U.** (2003). Independence of apical  $\text{Cl}^-/\text{HCO}_3^-$  exchange and anion conductance in duodenal  $\text{HCO}_3^-$  secretion. *Am. J. Physiol.* **285**, G887-G897.
- Steward, M. C., Ishiguro, H. and Case, R. M.** (2005). Mechanisms of bicarbonate secretion in the pancreatic duct. *Annu. Rev. Physiol.* **67**, 377-409.
- Sullivan, S. K.** (1986). Bicarbonate secretion by rabbit proximal colon. *Am. J. Physiol.* **251**, G436-G445.
- Sullivan, S. K. and Field, M.** (1991). Ion transport across mammalian small intestine. In *Handbook of Physiology, Section 6, The Gastrointestinal System, Intestinal Absorption and Secretion*, vol. 4 (ed. M. Field and R. A. Frizzell), pp. 287-301. New York: American Physiological Society.
- Thevenod, F., Roussa, E., Schmitt, B. M. and Romero, M. F.** (1999). Cloning and immunolocalization of a rat pancreatic  $\text{Na}^+$  bicarbonate cotransporter. *Biochem. Biophys. Res. Commun.* **264**, 291-298.
- Walker, N. M., Flagella, M., Gawenis, L. R., Shull, G. E. and Clarke, L. L.** (2002). An alternate pathway of cAMP-stimulated  $\text{Cl}^-$  secretion across the NKCC1-null murine duodenum. *Gastroenterology* **123**, 531-541.
- Wellard, G. A. and Hume, I. D.** (1981). Digestion and digesta passage in the brushtail possum, *Trichosurus vulpecula* (Kerr). *Aust. J. Zool.* **29**, 157-166.
- Welsh, M. J.** (1983). Inhibition of chloride secretion by furosemide in canine tracheal epithelium. *J. Membr. Biol.* **71**, 219-226.
- Welsh, M. J., Smith, P. L. and Frizzell, R. A.** (1983). Chloride secretion by canine tracheal epithelium: III. Membrane resistances and electromotive forces. *J. Membr. Biol.* **71**, 209-218.
- Wu, Q., Pierce, W. M., Jr and Delamere, N. A.** (1998). Cytoplasmic pH responses to carbonic anhydrase inhibitors in cultured rabbit nonpigmented ciliary epithelium. *J. Membr. Biol.* **162**, 31-38.
